# Supplementary material for: Zoonotic Problems Reported by Sheep and Goat Farmers and Factors Potentially Contributing to the Occurrence of Brucellosis among Them
Source: MDPI journal article supplement (doi:10.3390/ijerph191610372), 2022-08-20
Supplement: s1 [file s1]

# Zoonotic problems reported by sheep and goat farmers in Greece and factors potentially contributing to their occurrence

D.T. Lianou, E. Petinaki, C.K. Michael, A. Skoulakis, P.J. Cripps, E.I. Katsarou, E. Papadopoulos, C. Billinis, A.I. Katsafadou, V.S. Mavrogianni, M. Caroprese, and G.C. Fthenakis

**Table S1.** Variables evaluated for potential association with confirmed diagnosis of brucellosis in small ruminant farmers ( $n = 444$ ) during a countrywide study in Greece.

---

|                                                                                                   |
|---------------------------------------------------------------------------------------------------|
| Farmer's gender (male / female)                                                                   |
| Length of farming activity (years)                                                                |
| Farmer's professional involvement in farming (full-time / part-time)                              |
| Farmer's daily time spent at the farm (hours)                                                     |
| Farmer's education (primary / secondary / post-secondary vocational / tertiary)                   |
| Farmer's family farming tradition (yes / no)                                                      |
| Management system applied in the farm (description according to EFSA classification) <sup>1</sup> |
| Transhumance (yes / no)                                                                           |
| Application of machine- or hand-milking                                                           |
| Number of animals in the farm (no.)                                                               |
| Presence of large ruminants (cattle, buffaloes) in the farm (yes / no)                            |
| Presence of pigs in the farm (yes / no)                                                           |
| Presence of dogs in the farm (yes / no)                                                           |
| Presence of cats in the farm (yes / no)                                                           |
| Presence of equines (horses, donkeys, mules, hinnies) in the farm (yes / no)                      |
| Breed of animals in the farm (crossbreeds / imported / local)                                     |
| Annual veterinary visits to the farm (no).                                                        |
| Daily number of milking sessions applied in the farm (no.)                                        |
| Annual occasions of disinfections performed in the farm (no.)                                     |
| Application of reproductive control practices in the farm (yes / no) <sup>2</sup>                 |

Availability of a separate lambing / kidding area

Vaccination against brucellosis applied in the farm (yes / no)

Distance of farm from hospital or clinic (km)

- 
1. Classification according to the European Food Safety Authority system (European Food Safety Authority. Scientific opinion on the welfare risks related to the farming of sheep for wool, meat and milk production. *EFSA J.* **2014**, 12, 3933-4060).
  2. In this context, reproductive control practices refer only to intravaginal application of progesterone sponges or devices.

**Table S2.** Details of multivariable models employed for the evaluation of various variables for potential association with reported occurrence of brucellosis in sheep and goat farmers in Greece.

| Outcome                                   | Variables offered to the multivariable models (n) | Variables required in the final models                                                                                                                                                                 |
|-------------------------------------------|---------------------------------------------------|--------------------------------------------------------------------------------------------------------------------------------------------------------------------------------------------------------|
| Occurrence of brucellosis - sheep farmers | 8                                                 | (a) Application of machine- or hand-milking, (b) Presence of dogs in the farm, (c) Presence of cats in the farm, (d) Annual veterinary visits to the farm, (e) Availability of a separate lambing area |
| Occurrence of brucellosis – goat farmers  | 7                                                 | (a) Farmer’s education, (b) Management system applied in the farm, (c) Annual veterinary visits to the farm, (d) Availability of a separate kidding area                                               |

**Table S3.** Biosecurity-related factors applied in 444 small ruminant farms that were evaluated for potential association with reported occurrence of brucellosis during a countrywide study in Greece and scores assigned for each practice aligning or opposing biosecurity rules.

| Biosecurity-related practice                                     | Score assignment according to the practices applied     |                                                          |
|------------------------------------------------------------------|---------------------------------------------------------|----------------------------------------------------------|
|                                                                  | Score '1'                                               | Score '0'                                                |
| Quarantine of new animals arriving at the farm                   | Yes                                                     | No                                                       |
| Isolation of sick animals at the farm                            | Yes                                                     | No                                                       |
| Means for disposal of carcasses of animals that died in the farm | Incineration / Burial /<br>Removal by specialised agent | Given to dogs / Left unburied<br>/ Left in water streams |
| Presence of a ditch at the entrance of the farm                  | Yes                                                     | No                                                       |
| Presence of a fence or a wall around the farm                    | Yes                                                     | No                                                       |
| Carrying out disinfections in the farm                           | Yes                                                     | No                                                       |

**Table S4.** Results of univariable associations of socio-demographic, farm management and geographic factors with reported occurrence of brucellosis in sheep (n=282) or goat (n=103) farmers during a countrywide study in Greece.

| A. Sheep farmers ( <i>n</i> = 301)                          |                 |                 |                |                                                         |               |               |              |          |
|-------------------------------------------------------------|-----------------|-----------------|----------------|---------------------------------------------------------|---------------|---------------|--------------|----------|
| Farmers with no occurrence of brucellosis ( <i>n</i> = 266) |                 |                 |                | Farmers with occurrence of brucellosis ( <i>n</i> = 35) |               |               |              | <i>P</i> |
| Farmer's gender                                             |                 |                 |                |                                                         |               |               |              |          |
| Female                                                      |                 | Male            |                | Female                                                  |               | Male          |              |          |
| 5.6% (15/266)                                               |                 | 94.4% (251/266) |                | 5.7% (2/35)                                             |               | 94.3% (33/35) |              | 0.99     |
| Farmer's age                                                |                 |                 |                |                                                         |               |               |              |          |
| 46.8±1.2 years                                              |                 |                 |                | 49.7±2.2 years                                          |               |               |              | 0.19     |
| Length of farming activity                                  |                 |                 |                |                                                         |               |               |              |          |
| 23.0±1.8 years                                              |                 |                 |                | 29.2±2.5 years                                          |               |               |              | 0.036    |
| Farmer's professional involvement in farming                |                 |                 |                |                                                         |               |               |              |          |
| Full-time                                                   |                 | Part-time       |                | Full-time                                               |               | Part-time     |              |          |
| 86.0% (229/266)                                             |                 | 14.0% (27/266)  |                | 94.3% (33/35)                                           |               | 5.7% (2/35)   |              | 0.37     |
| Farmer's daily time spent at the farm                       |                 |                 |                |                                                         |               |               |              |          |
| 11.4±0.6 hours                                              |                 |                 |                | 12.6±0.7 hours                                          |               |               |              | 0.11     |
| Farmer's education                                          |                 |                 |                |                                                         |               |               |              |          |
| Primary                                                     | Secondary       | Vocational      | Tertiary       | Primary                                                 | Secondary     | Vocational    | Tertiary     |          |
| 24.4% (65/266)                                              | 44.7% (119/266) | 18.0% (48/266)  | 12.8% (34/266) | 34.3% (12/35)                                           | 40.0% (14/35) | 11.4% (4/35)  | 14.3% (5/35) | 0.54     |

| Farmer's family farming tradition       |                 |                 |               |                 |                |                |             | 0.41  |
|-----------------------------------------|-----------------|-----------------|---------------|-----------------|----------------|----------------|-------------|-------|
| Yes                                     |                 | No              |               | Yes             |                | No             |             |       |
| 86.5% (230/266)                         |                 | 13.5% (36/266)  |               | 91.4% (32/35)   |                | 8.6% (3/35)    |             |       |
| Management system applied in farms      |                 |                 |               |                 |                |                |             | 0.68  |
| Intensive                               | Semi-intensive  | Semi-extensive  | Extensive     | Intensive       | Semi-intensive | Semi-extensive | Extensive   |       |
| 15.0% (40/266)                          | 46.7% (124/266) | 34.6% (92/266)  | 3.7% (10/266) | 8.6% (3/35)     | 45.7% (16/35)  | 40.0% (14/35)  | 5.7% (2/35) |       |
| Transhumance                            |                 |                 |               |                 |                |                |             | 0.77  |
| Yes                                     |                 | No              |               | Yes             |                | No             |             |       |
| 13.2% (35/266)                          |                 | 86.8% (231/266) |               | 11.4% (4/35)    |                | 88.6% (31/35)  |             |       |
| Application of machine- or hand-milking |                 |                 |               |                 |                |                |             | 0.003 |
| Machine-milking                         |                 | Hand-milking    |               | Machine-milking |                | Hand-milking   |             |       |
| 83.5% (222/266)                         |                 | 16.5% (44/266)  |               | 61.8% (22/35)   |                | 38.2% (13/35)  |             |       |
| Number of animals in the farm           |                 |                 |               |                 |                |                |             | 0.77  |
| 325±18 animals                          |                 |                 |               | 312±28 animals  |                |                |             |       |
| Breed of animals in the farm            |                 |                 |               |                 |                |                |             |       |
| Crossbreeds                             | Imported        | Local           | Crossbreeds   | Imported        | Local          |                |             | 0.22  |
| 25.6% (68/266)                          | 38.0% (101/266) | 36.5% (97/266)  | 31.4% (11/35) | 22.9% (8/35)    | 45.8% (16/35)  |                |             |       |
| Annual veterinary visits to the farm    |                 |                 |               |                 |                |                |             | 0.11  |
| 7.7±0.6 visits                          |                 |                 |               | 5.7±0.8 visits  |                |                |             |       |

| Daily number of milking sessions applied in the farm      |                 |                          |               | 0.33  |
|-----------------------------------------------------------|-----------------|--------------------------|---------------|-------|
| 2.2±0.0 milking sessions                                  |                 | 2.3±0.1 milking sessions |               |       |
| Annual occasions of disinfections performed in the farm   |                 |                          |               | 0.43  |
| 3.5±0.2 occasions                                         |                 | 3.0±0.4 occasions        |               |       |
| Application of reproductive control practices in the farm |                 |                          |               | 0.75  |
| Yes                                                       | No              | Yes                      | No            |       |
| 31.2% (83/266)                                            | 68.8% (183/266) | 28.6% (10/35)            | 71.4% (25/35) |       |
| Availability of a separate lambing area                   |                 |                          |               | 0.048 |
| Yes                                                       | No              | Yes                      | No            |       |
| 53.8% (143/266)                                           | 46.2% (123/266) | 71.4% (25/35)            | 28.6% (10/35) |       |
| Vaccination against brucellosis applied in the farm       |                 |                          |               | n/a   |
| Yes                                                       | No              | Yes                      | No            |       |
| 100% (266/266)                                            | 0.0% (0/266)    | 100% (35/35)             | 0.0% (0/35)   |       |
| Distance from hospital or clinic                          |                 |                          |               | 0.44  |
| 14.7±0.4 km                                               |                 | 13.7±1.2 km              |               |       |
| Presence of large ruminants in the farm                   |                 |                          |               | 0.76  |
| Yes                                                       | No              | Yes                      | No            |       |
| 9.8% (26/266)                                             | 90.2% (240/266) | 11.4% (4/35)             | 88.6% (31/35) |       |

| Presence of pigs in the farm                               |                       |                                                         |                        | 0.23     |
|------------------------------------------------------------|-----------------------|---------------------------------------------------------|------------------------|----------|
| Yes<br>12.8% (34/266)                                      | No<br>87.2% (232/266) | Yes<br>5.7% (2/35)                                      | No<br>84.3% (33/35)    |          |
| Presence of dogs in the farm                               |                       |                                                         |                        | 0.09     |
| Yes<br>92.5% (246/266)                                     | No<br>7.5% (20/266)   | Yes<br>100% (35/35)                                     | No<br>0.0% (0/35)      |          |
| Presence of cats in the farm                               |                       |                                                         |                        | 0.008    |
| Yes<br>70.3% (187/266)                                     | No<br>29.7% (79/266)  | Yes<br>91.4% (32/35)                                    | No<br>8.6% (3/35)      |          |
| Presence of equines in the farm                            |                       |                                                         |                        | 0.78     |
| Yes<br>18.0% (48/266)                                      | No<br>82.0% (218/266) | Yes<br>20.0% (7/35)                                     | No<br>80.0% (28/35)    |          |
| B. Goat farmers ( <i>n</i> = 106)                          |                       |                                                         |                        |          |
| Farmers with no occurrence of brucellosis ( <i>n</i> = 84) |                       | Farmers with occurrence of brucellosis ( <i>n</i> = 22) |                        | <i>P</i> |
| Farmer's gender                                            |                       |                                                         |                        | 0.11     |
| Female<br>10.7% (9/84)                                     | Male<br>89.3% (75/84) | Female<br>0.0% (0/22)                                   | Male<br>100.0% (22/22) |          |
| Farmer's age                                               |                       |                                                         |                        | 0.93     |
| 46.5±1.4 years                                             |                       | 46.8±2.7 years                                          |                        |          |



| Length of farming activity                   |                |                |               |                |                |                |              | 0.82  |
|----------------------------------------------|----------------|----------------|---------------|----------------|----------------|----------------|--------------|-------|
| 23.9±1.8 years                               |                |                |               | 24.8±3.1 years |                |                |              |       |
| Farmer's professional involvement in farming |                |                |               |                |                |                |              | 0.44  |
| Full-time                                    |                | Part-time      |               | Full-time      |                | Part-time      |              |       |
| 88.1% (74/84)                                |                | 11.9% (10/84)  |               | 81.8% (18/22)  |                | 18.2% (4/22)   |              |       |
| Farmer's daily time spent at the farm        |                |                |               |                |                |                |              | 0.56  |
| 12.3±0.4 hours                               |                |                |               | 12.6±0.7 hours |                |                |              |       |
| Farmer's education                           |                |                |               |                |                |                |              | 0.12  |
| Primary                                      | Secondary      | Vocational     | Tertiary      | Primary        | Secondary      | Vocational     | Tertiary     |       |
| 23.8% (20/84)                                | 46.4% (39/84)  | 11.9% (10/84)  | 17.9% (15/84) | 50.0% (11/22)  | 31.8% (7/22)   | 9.1% (2/22)    | 9.1% (2/22)  |       |
| Farmer's family farming tradition            |                |                |               |                |                |                |              | 0.44  |
| Yes                                          |                | No             |               | Yes            |                | No             |              |       |
| 84.5% (71/84)                                |                | 15.5% (13/84)  |               | 90.9% (20/22)  |                | 9.1% (2/22)    |              |       |
| Management system applied in farms           |                |                |               |                |                |                |              | 0.19  |
| Intensive                                    | Semi-intensive | Semi-extensive | Extensive     | Intensive      | Semi-intensive | Semi-extensive | Extensive    |       |
| 9.5% (8/84)                                  | 29.8% (25/84)  | 48.8% (41/84)  | 11.9% (10/84) | 0.0% (0/22)    | 18.2% (4/22)   | 59.1% (13/22)  | 22.7% (5/22) |       |
| Transhumance                                 |                |                |               |                |                |                |              | 0.032 |
| Yes                                          |                | No             |               | Yes            |                | No             |              |       |
| 19.0% (16/84)                                |                | 81.0% (68/84)  |               | 40.9% (9/22)   |                | 59.1% (13/22)  |              |       |

| Application of machine- or hand-milking                   |  |               |                          |               |  |
|-----------------------------------------------------------|--|---------------|--------------------------|---------------|--|
| Machine-milking                                           |  | Hand-milking  |                          | Hand-milking  |  |
| 56.0% (47/84)                                             |  | 44.0% (37/84) |                          | 45.5% (10/22) |  |
| 0.38                                                      |  |               |                          |               |  |
| Number of animals in the farm                             |  |               |                          |               |  |
| 223±22 animals                                            |  |               | 250±38 animals           |               |  |
| 0.62                                                      |  |               |                          |               |  |
| Breed of animals in the farm                              |  |               |                          |               |  |
| Crossbreeds                                               |  | Imported      |                          | Local         |  |
| 21.4% (18/84)                                             |  | 38.1% (32/84) |                          | 40.5% (34/84) |  |
| 27.3% (6/22)                                              |  | 31.8% (7/22)  |                          | 40.9% (9/22)  |  |
| 0.80                                                      |  |               |                          |               |  |
| Annual veterinary visits to the farm                      |  |               |                          |               |  |
| 8.1±0.8 visits                                            |  |               | 6.0±0.9 visits           |               |  |
| 0.19                                                      |  |               |                          |               |  |
| Daily number of milking sessions applied in the farm      |  |               |                          |               |  |
| 2.1±0.0 milking sessions                                  |  |               | 2.0±0.0 milking sessions |               |  |
| 0.39                                                      |  |               |                          |               |  |
| Annual occasions of disinfections performed in the farm   |  |               |                          |               |  |
| 4.0±0.4 occasions                                         |  |               | 3.4±1.1 occasions        |               |  |
| 0.60                                                      |  |               |                          |               |  |
| Application of reproductive control practices in the farm |  |               |                          |               |  |
| Yes                                                       |  | No            |                          | No            |  |
| 16.7% (14/84)                                             |  | 83.3% (70/84) |                          | 4.5% (1/22)   |  |
| 95.5% (21/22)                                             |  | 0.15          |                          |               |  |
| Availability of a separate kidding area                   |  |               |                          |               |  |
| Yes                                                       |  | No            |                          | No            |  |
| 41.7% (35/84)                                             |  | 58.3% (49/84) |                          | 77.3% (17/22) |  |
| 22.7% (5/22)                                              |  | 0.003         |                          |               |  |

| Vaccination against brucellosis applied in the farm |             |                |             |      |
|-----------------------------------------------------|-------------|----------------|-------------|------|
| Yes                                                 | No          | Yes            | No          |      |
| 100% (84/84)                                        | 0.0% (0/81) | 100.0% (22/22) | 0.0% (0/22) | n/a  |
| Distance from hospital or clinic                    |             |                |             |      |
| 17.3±1.2 km                                         |             | 16.6±1.6 km    |             | 0.76 |
| Presence of large ruminants in the farm             |             |                |             |      |
| Yes                                                 | No          | Yes            | No          |      |
| 11                                                  | 73          | 2              | 20          | 0.61 |
| Presence of pigs in the farm                        |             |                |             |      |
| Yes                                                 | No          | Yes            | No          |      |
| 12                                                  | 72          | 2              | 20          | 0.52 |
| Presence of dogs in the farm                        |             |                |             |      |
| Yes                                                 | No          | Yes            | No          |      |
| 81                                                  | 3           | 22             | 0           | 0.37 |
| Presence of cats in the farm                        |             |                |             |      |
| Yes                                                 | No          | Yes            | No          |      |
| 60                                                  | 24          | 16             | 6           | 0.90 |
| Presence of equines in the farm                     |             |                |             |      |
| Yes                                                 | No          | Yes            | No          |      |
| 18                                                  | 66          | 6              | 16          | 0.56 |

**Table S5.** Estimation of the total number of small ruminant farmers in the country who had had brucellosis at some point during their professional life.

| <b>Proportion (95% confidence intervals) of farmers in the studied sample,<br/>who had had brucellosis during their professional life</b>           |                                 |                                |
|-----------------------------------------------------------------------------------------------------------------------------------------------------|---------------------------------|--------------------------------|
| Area of the country                                                                                                                                 | Sheep farmers                   | Goat farmers                   |
| Central                                                                                                                                             | 17/127<br>0.134 (0.085 – 0.204) | 7/36<br>0.194 (0.098 – 0.350)  |
| Islands                                                                                                                                             | 1/43<br>0.023 (0.004 – 0.121)   | 0/16<br>0.000 (0.000 – 0.194)  |
| North                                                                                                                                               | 10/87<br>0.115 (0.064 – 0.199)  | 5/36<br>0.139 (0.061 – 0.287)  |
| South                                                                                                                                               | 7/68<br>0.103 (0.051 – 0.198)   | 10/31<br>0.323 (0.186 – 0.499) |
| <b>Number of small ruminant farms available in the country in 2019</b>                                                                              |                                 |                                |
| Area of the country                                                                                                                                 | Sheep farms                     | Goat farms                     |
| Central                                                                                                                                             | 13037                           | 3660                           |
| Islands                                                                                                                                             | 8970                            | 1837                           |
| North                                                                                                                                               | 13420                           | 4763                           |
| South                                                                                                                                               | 6860                            | 2771                           |
| <b>Total number (95% confidence intervals) of small ruminant farmers in the country,<br/>who had had brucellosis during their professional life</b> |                                 |                                |
| Area of the country                                                                                                                                 | Sheep farmers                   | Goat farmers                   |
| Central                                                                                                                                             | 1746 (1112 – 2660)              | 712 (357 – 1283)               |
| Islands                                                                                                                                             | 209 (37 – 1083)                 | 0 (0 – 356)                    |
| North                                                                                                                                               | 1542 (854 – 2668)               | 662 (290 – 1365)               |
| South                                                                                                                                               | 706 (348 – 1355)                | 894 (515 – 1382)               |
|                                                                                                                                                     | 4203 (2351 – 7766)              | 2268 (1162 – 4386)             |
